## COMMENTS AND RESPONSES

### Hypoglycemia and Clinical Outcomes in Patients With Diabetes Hospitalized in the General Ward

Response to Ng et al.

In our study of hypoglycemia in hospitalized patients with diabetes (1), we have found a strong association between the frequency and severity of hypoglycemia and clinical outcomes including mortality and length of hospital stay. In their comment, Ng et al. (2) remind us that hypoglycemia as a clinical event is characterized not only by the blood glucose level but also by its duration. As expected, longer duration of hypoglycemia is associated with adverse outcomes (3). Previously published studies have shown that higher

staffing levels in the hospitals are associated with better care (4), including lower rates of “failure to rescue” patients from critical events such as cardiac arrest, shock, or gastrointestinal bleeding. The report by Ng et al. provides evidence that improvement in care as a result of better nurse staffing extends to the treatment of hypoglycemia. Their findings lend further support to the importance of adequate levels of health care personnel to the quality of treatment of hospitalized patients.

ALEXANDER TURCHIN, MD, MS<sup>1,2,3</sup>  
MICHAEL E. MATHENY, MD, MS, MPH<sup>4,5</sup>  
MARIA SHUBINA, SCD<sup>1</sup>  
JAMES V. SCANLON, PHARM<sup>6</sup>  
BONNIE GREENWOOD, PHARM<sup>1</sup>, BCPS<sup>1</sup>  
MERRI L. PENDERGRASS, MD, PHD<sup>1,3,7</sup>

From <sup>1</sup>Brigham and Women's Hospital, Boston, Massachusetts; <sup>2</sup>Clinical Informatics Research and Development, Partners Healthcare System, Boston, Massachusetts; <sup>3</sup>Harvard Medical School, Boston, Massachusetts; <sup>4</sup>Vanderbilt Medical Center, Nashville, Tennessee; the <sup>5</sup>Tennessee Valley Healthcare System, Veterans Administration, Nashville, Tennessee; <sup>6</sup>Massachusetts College of Pharmacy and Health Sciences, Worcester, Massachusetts; and <sup>7</sup>Medco Health Solutions, Franklin Lakes, New Jersey.

Corresponding author: Alexander Turchin, aturchin@partners.org.  
DOI: 10.2337/dc09-1557

© 2009 by the American Diabetes Association. Readers may use this article as long as the work is properly cited, the use is educational and not for profit, and the work is not altered. See <http://creativecommons.org/licenses/by-nc-nd/3.0/> for details.

**Acknowledgments**— This study was supported in part by grants from the Diabetes Action Research and Education Foundation (to A.T.) and the National Library of Medicine (to M.E.M.).

No potential conflicts of interest relevant to this article were reported.

#### References

1. Turchin A, Matheny ME, Shubina M, Scanlon JV, Greenwood B, Pendergrass ML. Hypoglycemia and clinical outcomes in patients with diabetes hospitalized in the general ward. *Diabetes Care* 2009;32:1153–1157
2. Ng JM, Cox H, Longbotham D, Kilpatrick ES, Atkin SL, Allan BJ. Hypoglycemia and clinical outcomes in patients with diabetes hospitalized in the general ward (Letter). *Diabetes Care* 2009;32:e151. DOI: 10.2337/dc09-1341
3. Auer RN. Hypoglycemic brain damage. *Forensic Sci Int* 2004;146:105–110
4. Needleman J, Buerhaus P, Mattke S, Stewart M, Zelevinsky K. Nurse-staffing levels and the quality of care in hospitals. *N Engl J Med* 2002;346:1715–1722
